# Supplementary material
Source: PubMed Central journal article supplement (PMC3203659)
Supplement: cr201143x2.pdf [file cr201143x2.pdf]

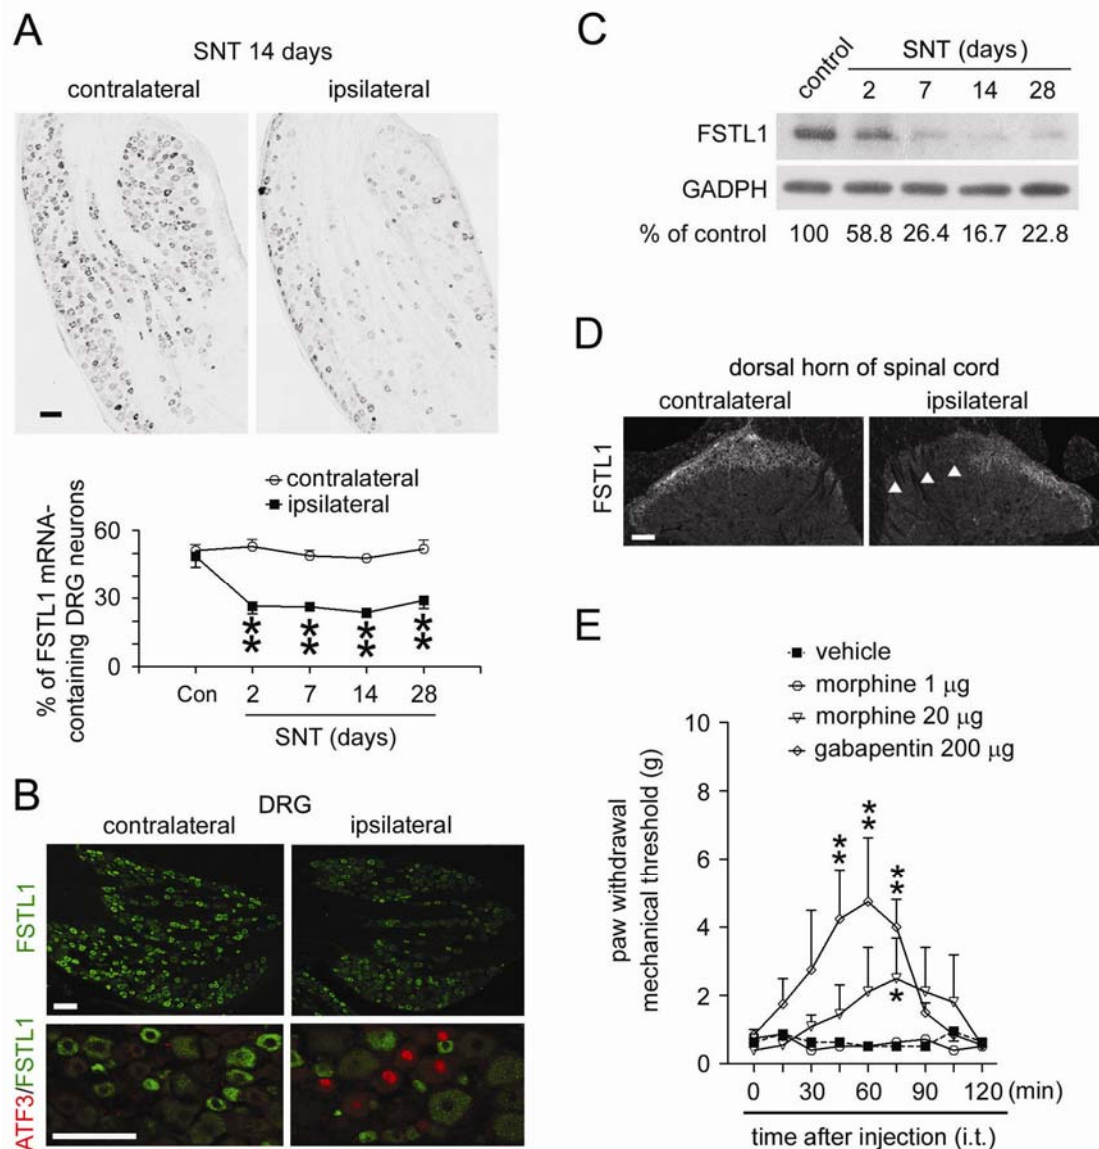

**Supplementary information, Figure S1** Decreased FSTL1 expression in DRG neurons after peripheral axotomy.

(A) *In situ* hybridization showed that FSTL1 mRNA level was decreased in the ipsilateral L5 DRG of the rat after unilateral sciatic nerve transection (SNT) (mean  $\pm$  s.e.m.,  $n = 3$ , Student's *t*-test, \*  $P < 0.05$ , \*\*  $P < 0.01$  versus the contralateral DRG). Scale bar, 100  $\mu$ m.

(B) Immunostaining showed a reduction in number of FSTL1-positive DRG neurons 14 days after unilateral SNT.

Double-immunofluorescent labeling showed the absence of FSTL1 in the injured

DRG neurons labeled by ATF3 in nucleus. Scale bars, 100  $\mu$ m. (C) Immunoblotting showed a reduction of FSTL1 protein in L5 DRG after SNT. FSTL1 intensity is normalized to GAPDH (n = 3). (D) In the ipsilateral dorsal horn of L5 spinal segment, FSTL1-labeling was reduced in afferent fibers in the unilateral laminae I-II (arrowheads) of rat spinal cord 14 days after SNT. Scale bar, 100  $\mu$ m. (E) Intrathecal injection (i.t.) with gabapentin or a high dose (20  $\mu$ g) of morphine inhibited mechanical allodynia 14 days after SNI. However, 1  $\mu$ g of morphine (i.t.) could not produce any apparent effect. \*  $P < 0.05$ , \*\*  $P < 0.01$  versus SNI rats treated with vehicle (mean  $\pm$  s.e.m., two-way ANOVA with a *post hoc* Bonferroni's test, n = 6-8).
